# Supplementary material for: Cardiac Specific Overexpression of Mitochondrial Omi/HtrA2 Induces Myocardial Apoptosis and Cardiac Dysfunction
Source: PubMed Central journal article supplement (PMC5141441; doi:10.1038/srep37927), 2016-12-07
Supplement: srep37927-s1.pdf [file srep37927-s1.pdf]

## **Cardiac Specific Overexpression of Mitochondrial Omi/HtrA2 Induces Myocardial Apoptosis and Cardiac Dysfunction**

Ke Wang<sup>1</sup>, Yuexing Yuan<sup>2</sup>, Xin Liu<sup>1</sup>, Wayne Bond Lau<sup>2</sup>, Lin Zuo<sup>3</sup>, Xiaoliang Wang<sup>3</sup>, Lu Ma<sup>1</sup>, Kun Jiao<sup>1</sup>, Jianyu Shang<sup>1</sup>, Wen Wang<sup>1</sup>, Xinliang Ma<sup>1,2,4</sup>, Huirong Liu, MD, PhD<sup>1,4\*</sup>

<sup>1</sup>Department of Physiology and Pathophysiology, School of Basic Medical Sciences, Capital Medical University, Beijing, 100069, P. R. China.

<sup>2</sup>Department of Emergency Medicine, Thomas Jefferson University, 1020 Sansom Street, Philadelphia, PA 19107, USA.

<sup>3</sup>Department of Physiology, Shanxi Medical University, Taiyuan, Shanxi, 030001, P. R. China.

<sup>4</sup>Beijing Key Laboratory of Metabolic Disturbance Related Cardiovascular Disease, Capital Medical University, Beijing, 100069, P. R. China.

\*Address proofs to:

Huirong Liu, MD, PhD

Department of Physiology and Pathophysiology

School of Basic Medical Sciences

Capital Medical University

10 Xitoutiao, You An Men

Beijing

P. R. China, 100069

Tel: 011-86-10-83911830

Fax: 011-86-10-63294027

E-mail: [liuhr2000@126.com](mailto:liuhr2000@126.com)

Supplemental Figure 1

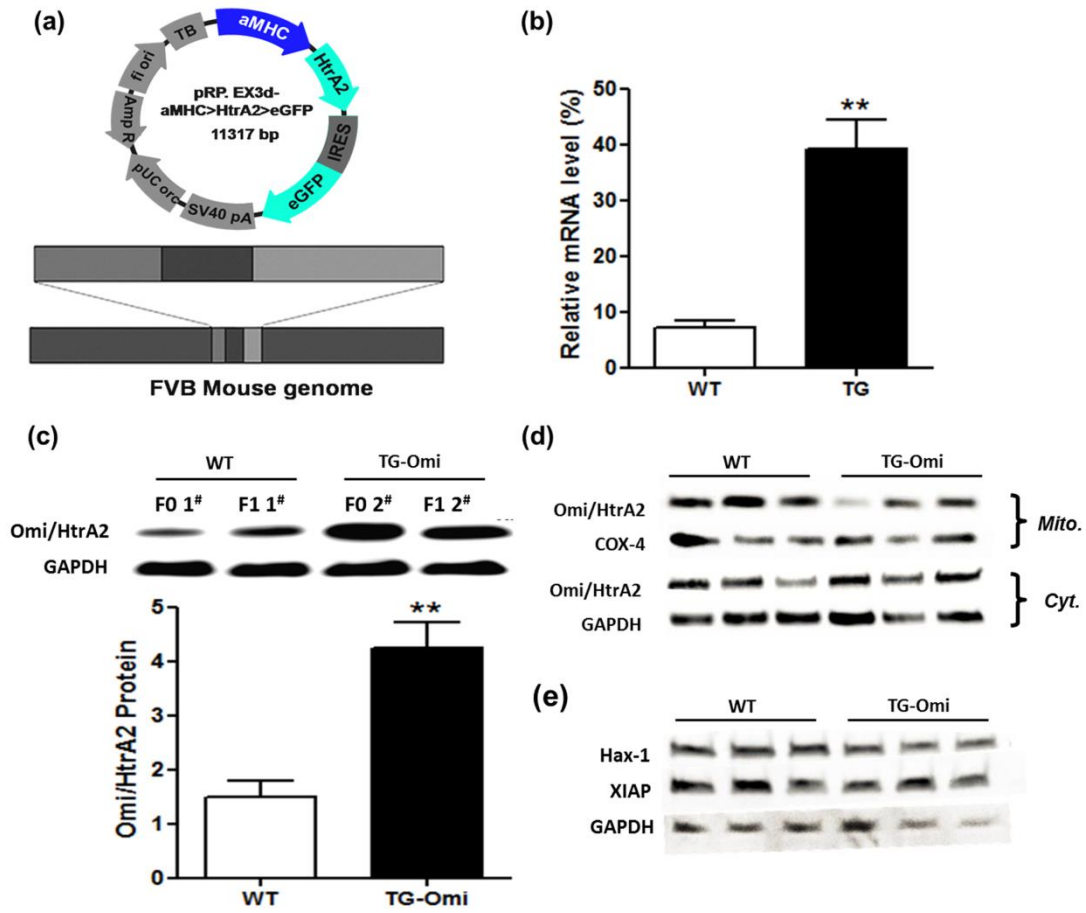

Supplemental Figure 2

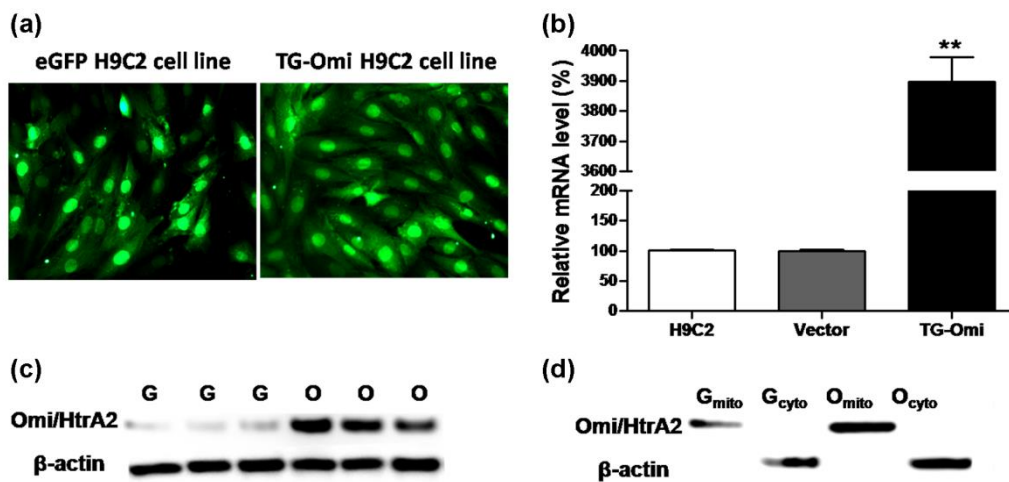

## Supplemental Figure Legend

**Supplemental Figure 1.** General characteristics of cardiac-specific Omi/HtrA2 transgenic mice. **(a)**, Schematic illustration of DNA construct, consisting of cardiac-specific alpha-myosin heavy chain (aMHC) promoter and mouse Omi/HtrA2 cDNA. **(b)**, Omi/HtrA2 mRNA expression was measured by quantitative RT-PCR with mRNA isolated from the left ventricles of WT mice and Omi/HtrA2 transgenic mice (TG - Omi). **(c)**, Western blot of Omi/HtrA2 protein in left ventricle protein extracts from WT mice and Omi/HtrA2 transgenic mice (TG - Omi). **(d)**, Western blot of Omi/HtrA2 protein in either mitochondrial (mito.) or cytosolic (cyto.) fraction from WT mice and Omi/HtrA2 transgenic mice. **(e)**, Western blot of XIAP and HAX-1 protein in left ventricle protein extracts from WT mice and Omi/HtrA2 transgenic mice.  $n = 3 - 5/\text{genotype}$ .  $**p < 0.01$  vs. WT

**Supplemental Figure 2.** General characteristics of H9C2 cell lines stably transfected with mitochondrial Omi/HtrA2. **(a)**, Fluorescent images of green shows positive transfected H9C2 cell with Omi/HtrA2. **(b)**, Omi/HtrA2 mRNA expression was measured with quantitative RT-PCR with mRNA. **(c)**, Western blot of Omi/HtrA2 protein in whole cell fraction. **(d)**, Western blot of Omi/HtrA2 protein in either mitochondrial or cytosolic fraction. (G: H9C2 cell line stably transfected with eGFP; O: H9C2 cell line with both eGFP and mitochondrial Omi/HtrA2; mito: Mitochondrial fraction; cyto: Cytoplasmic fraction)  $n=10-12$ each.  $**p < 0.01$  vs. eGFP H9C2 cell line (Vector)
